# Supplementary material
Source: ML conference proceedings conference paper supplement (https://openaccess.thecvf.com/content/ICCV2025/html/Wang_PacGDC_Label-Efficient_Generalizable_ICCV_2025_paper.html)
Supplement: Supplementary file 2 [file Wang_PacGDC_Label-Efficient_Generalizable_ICCV_2025_supplemental.pdf]

# PacGDC: Label-Efficient Generalizable Depth Completion with Projection Ambiguity and Consistency

## Supplementary Material

### 6. More Implementation Details

**Training Details.** *Zero-shot Depth Completion:* The training data simply concentrate all available training datasets following [50, 51], without any explicit balancing strategies as in [82]. Due to resource constraints, the training resolution is set to  $320 \times 320$ , though higher resolutions could further enhance performance, as observed in image analysis tasks [24, 59].

Due to the challenges posed by our highly diverse data setting, we modify the  $2 \times 2$  convolutions in the up/downsampling layers of SPNet to  $3 \times 3$  convolutions, as odd-sized kernels generally provide better stability [60]. This modification results in a slight increase in computational cost, as shown in Tab. 8. Notably, “Ours-T” even outperforms “SPNet-L” while requiring half the inference time and only 17% of the parameters.

Additionally, we impose a constraint that the minimum number of sparse depth pixels during training is two. This allows us to simplify the absolute term in the G2-MonoDepth loss [50] to L1 loss. The updated loss function  $\mathbb{L}$ , which measures the discrepancy between predictions  $\tilde{d}$  and our pseudo depth labels  $\hat{d}$ , is expressed as follows:

$$\begin{aligned} \mathbb{L}(\tilde{d}, \hat{d}) = & \frac{1}{\eta} \sum_{i=1}^{\eta} |T(\tilde{d}_i) - T(\hat{d}_i)| + \frac{1}{\eta} \sum_{i=1}^{\eta} |\tilde{d}_i - \hat{d}_i| \\ & + \frac{0.5}{\eta} \sum_{r=0}^3 \sum_{i=1}^{\eta} |\nabla(\rho_r(T(\tilde{d}_i) - T(\hat{d}_i)))|, \end{aligned} \quad (4)$$

where  $T$  is the standardize operation with mean deviation in [50]. The function  $\rho_r$  is the nearest neighbor interpolation at the  $1/2^r$  resolution.  $\nabla$  is the Sobel gradient in height and width directions.  $\eta$  denotes the number of valid pixels in dense labels.

**Few-shot Depth Completion:** In our few-shot experiments, we do not employ additional refinement strategies, such as SPN-like modules [7, 29, 45, 54] or depth enhancement methods [48, 49]. This ensures that our model retains SPNet’s efficiency. The training resolution is set to a randomly cropped  $256 \times 1216$ . The loss function is updated to the commonly used L1+L2 loss, following the standard practice in most intra-domain learning methods [54, 55, 78].

**Testing Details.** The details of the test datasets are provided in Tab. 7. For the uniform sampling experiment, test images are resized to a height of 320 pixels. In the sensor-captured experiment, the VOID and KITTI datasets follow standard protocols, with VOID maintaining its original resolution of

| Datasets   | Indoor | Outdoor | Label     | Size |
|------------|--------|---------|-----------|------|
| ETH3D [40] | ✓      | ✓       | Laser     | 454  |
| Ibims [20] | ✓      |         | Laser     | 100  |
| NYUv2 [42] | ✓      |         | RGB-D     | 654  |
| DIODE [46] | ✓      | ✓       | Laser     | 771  |
| Sintel [3] | ✓      | ✓       | Synthetic | 1064 |
| KITTI [11] |        | ✓       | Stereo    | 1000 |
| VOID [58]  | ✓      | ✓       | RGB-D     | 800  |

Table 7. The details of test datasets.

| Method  | Speed↑<br>(Image/s) | Param.↓<br>(M) | Memo.↓<br>(MB) | RMSE↓<br>(mm) | MAE↓<br>(mm) |
|---------|---------------------|----------------|----------------|---------------|--------------|
| SPNet-T | <b>126.6</b>        | <b>35.0</b>    | 330            | 2342          | 857          |
| Ours-T  | 121.8               | 39.7           | <b>242</b>     | <b>2143</b>   | 792          |
| SPNet-L | <b>60.2</b>         | <b>235.5</b>   | <b>1176</b>    | 2271          | 791          |
| Ours-L  | 58.7                | 254.4          | 1246           | <b>1966</b>   | <b>731</b>   |

Table 8. The inference costs under “Tiny” (T) and “Large” (L) configurations, including speed, parameters, and memory usage. Notably, the results of “Ours-T” are copied from the ablation study only using 25% training data (in gray).

480×640 and KITTI using a bottom center-cropped resolution of  $256 \times 1216$ . The final results on KITTI are obtained by averaging predictions from both original and horizontally flipped inputs following implementations in [54, 55].

### 7. More Quantitative Results

**Zero-shot Depth Completion on DDAD Dataset.** We further evaluate PacGDC on the DDAD [12] dataset, comparing to more generalizable and supervised baselines, following the standard protocol of VPP4DC [1]. The baseline results are directly taken from relevant papers. As shown in Tab. 9, the results further validate the effectiveness of PacGDC for zero-shot generalization.

| Method       | RMSE ↓ | MAE ↓ | Method                  | RMSE ↓      | MAE ↓       |
|--------------|--------|-------|-------------------------|-------------|-------------|
| BP-Net [45]  | 8903   | 2712  | Marigold-DC [47]        | 6449        | 2364        |
| VPP4DC [1]   | 10247  | 2290  | DMD <sup>3</sup> C [23] | 6609        | 1842        |
| OGNI-DC [81] | 6876   | 1867  | <b>Ours</b>             | <b>5918</b> | <b>1140</b> |

Table 9. **Zero-shot depth completion** on DDAD dataset under VPP4DC protocol.

**Few-shot Comparison with Other Baselines.** We supplement Tab. 4 with additional few-shot baselines. The base-

line results on KITTI validation set are directly taken from their original papers. As shown in Tab. 10, the results further demonstrate the superiority of our model in few-shot depth completion.

| Method           | Shot  | $RMSE \downarrow$ | $MAE \downarrow$ | $iRMSE \downarrow$ | $iMAE \downarrow$ |
|------------------|-------|-------------------|------------------|--------------------|-------------------|
| DepthPrompt [32] | 100   | 1798              | 602              | -                  | -                 |
| <b>Ours</b>      | 100   | <b>911</b>        | <b>229</b>       | <b>2.54</b>        | <b>0.96</b>       |
| DDPMD [35]       | 11000 | 966               | 291              | 3.63               | 1.48              |
| <b>Ours</b>      | 1000  | <b>830</b>        | <b>220</b>       | <b>2.28</b>        | <b>0.91</b>       |

Table 10. **Few-shot depth completion** on KITTI with 64 line LiDAR, supplementing Tab. 4.

**In-Domain Evaluation on the KITTI Dataset.** We further conduct standard in-domain evaluation by fine-tuning the pre-trained zero-shot PacGDC model on the entire KITTI training set (*i.e.*, 86K samples). As presented in Tab. 11, despite adopting a plain backbone without specialized components such as spatial propagation networks (SPNs), PacGDC delivers competitive performance on the KITTI validation set, comparable to recent state-of-the-art methods. Moreover, we submit the results of the fully fine-tuned model to the official KITTI test set leaderboard.

| Method      | Plain | $RMSE \downarrow$ | $MAE \downarrow$ | $iRMSE \downarrow$ | $iMAE \downarrow$ |
|-------------|-------|-------------------|------------------|--------------------|-------------------|
| BEV@DC [79] |       | 720               | <b>187</b>       | <b>1.88</b>        | <b>0.80</b>       |
| TPVD [68]   |       | <b>719</b>        | 187              | -                  | -                 |
| BEV@DC [79] | ✓     | 762               | 198              | 2.06               | 0.86              |
| TPVD [68]   | ✓     | 764               | <b>198</b>       | -                  | -                 |
| UniDC [30]  | ✓     | 824               | 209              | -                  | -                 |
| <b>Ours</b> | ✓     | <b>759</b>        | 203              | <b>2.06</b>        | <b>0.85</b>       |

Table 11. **In-domain evaluation** on KITTI validation set.

## 8. More Ablation Study

**Different Depth Foundation Models.** We evaluate our approach with four different depth foundation models: DepthAnything (DA) [69], DepthPro [2], DepthAnythingV2 (DAV2) [70], and DistillAnyDepth (DistillAD) [14]. As shown in Tab. 12, PacGDC consistently yields performance improvements over the baseline (without PacGDC), further validating the generality and effectiveness of our method.

It is worth noting that this experiment was newly introduced in response to reviewer feedback. Accordingly, our "Large" model continues to use DA and DepthPro, as reported in Tab. 6, rather than the combination of DA, DepthPro, and DAV2 used in Tab. 12.

## 9. More Visual Results

**Zero-Shot Depth Completion.** We further provide visual examples of zero-shot scenarios in Fig. 8, covering a range

| DA [69] | DepthPro [2] | DAV2 [70] | DistillAD [14] | $RMSE \downarrow$ | $MAE \downarrow$ |
|---------|--------------|-----------|----------------|-------------------|------------------|
|         |              |           |                | 2484              | 990              |
| ✓       |              |           |                | 2277              | 857              |
| ✓       | ✓            |           |                | 2241              | 854              |
|         | ✓            | ✓         |                | 2243              | 852              |
|         |              | ✓         | ✓              | 2276              | 859              |
| ✓       | ✓            | ✓         |                | <b>2232</b>       | <b>848</b>       |
| ✓       | ✓            | ✓         | ✓              | 2279              | 874              |

Table 12. **Ablation study** on different depth foundation models. Results with our data synthesis pipeline are shaded in gray.

of datasets and sparsity levels: DIODE with 1% sparsity, ETH3D with 10% sparsity, KITTI with 4-line LiDAR, and VOID with 1500 feature points derived from a VIO system. Across these scenarios, characterized by diverse scene semantics, varying scales, and different forms of depth sparsity, PacGDC consistently achieves higher accuracy in predicting metric depth maps compared to existing baselines.

**Few-Shot Depth Completion.** Visual results for few-shot scenarios are presented in Figs. 9 and 10, using models trained with 1, 10, 100, and 1000 samples. To provide a comprehensive analysis, we also separately showcase results for 8-, 16-, 32-, and 64-line LiDAR inputs under the same few-shot training settings. Leveraging the strong pre-trained weights from our synthesis pipeline, our model demonstrates significant qualitative improvements over in-domain learning baselines across all levels of supervision.

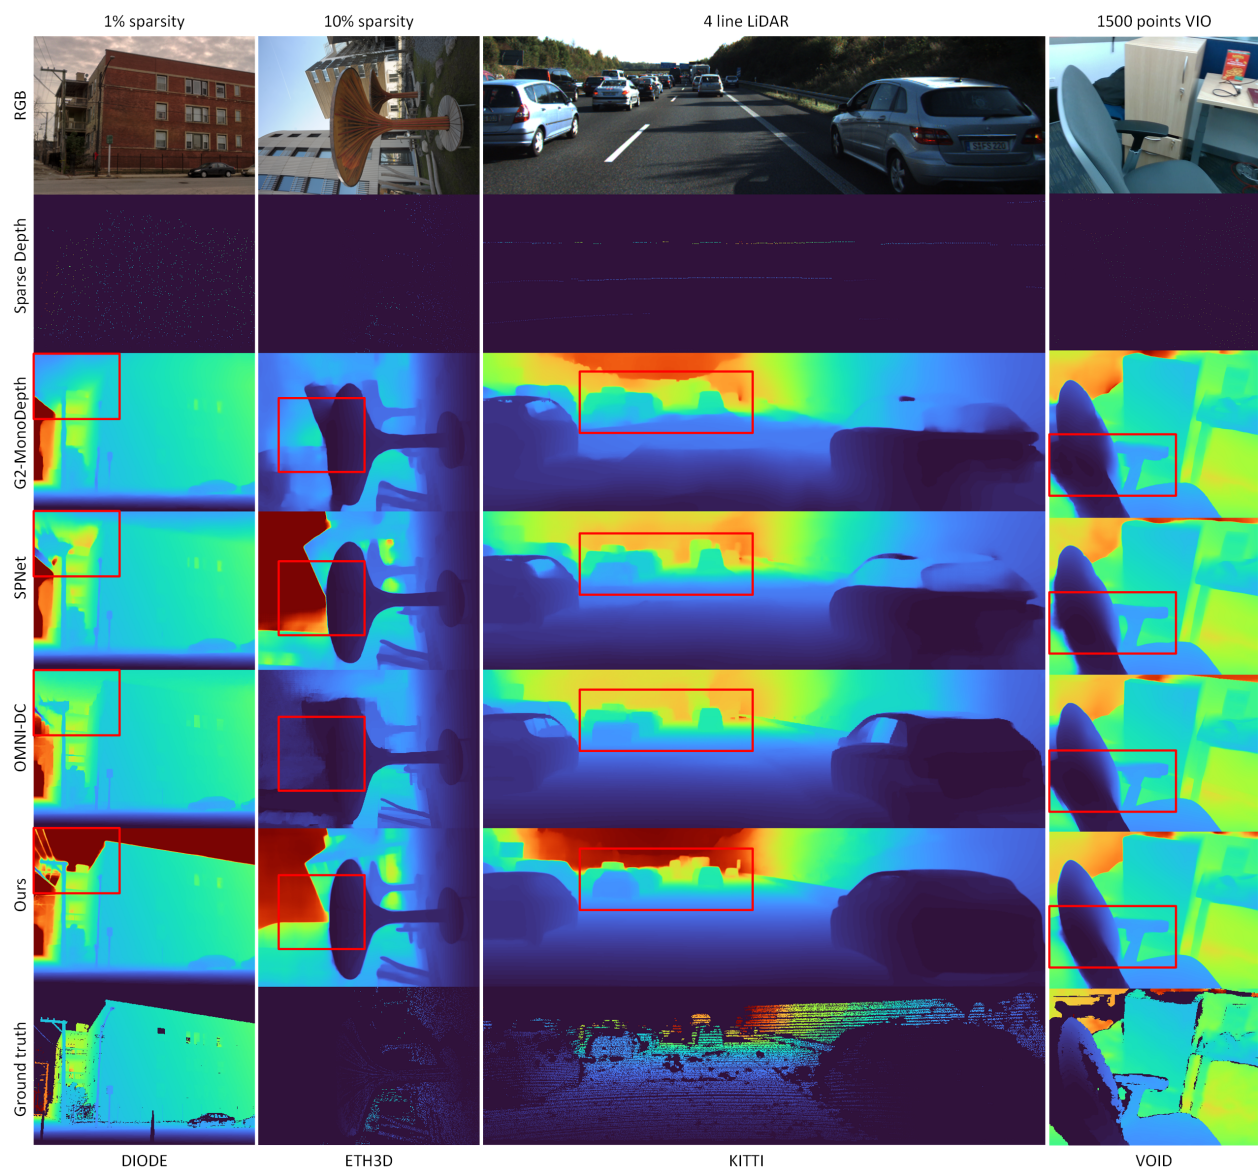

Figure 8. **Zero-shot depth completion** on unseen scenarios with different scene semantics/scales and depth sparsity/patterns.

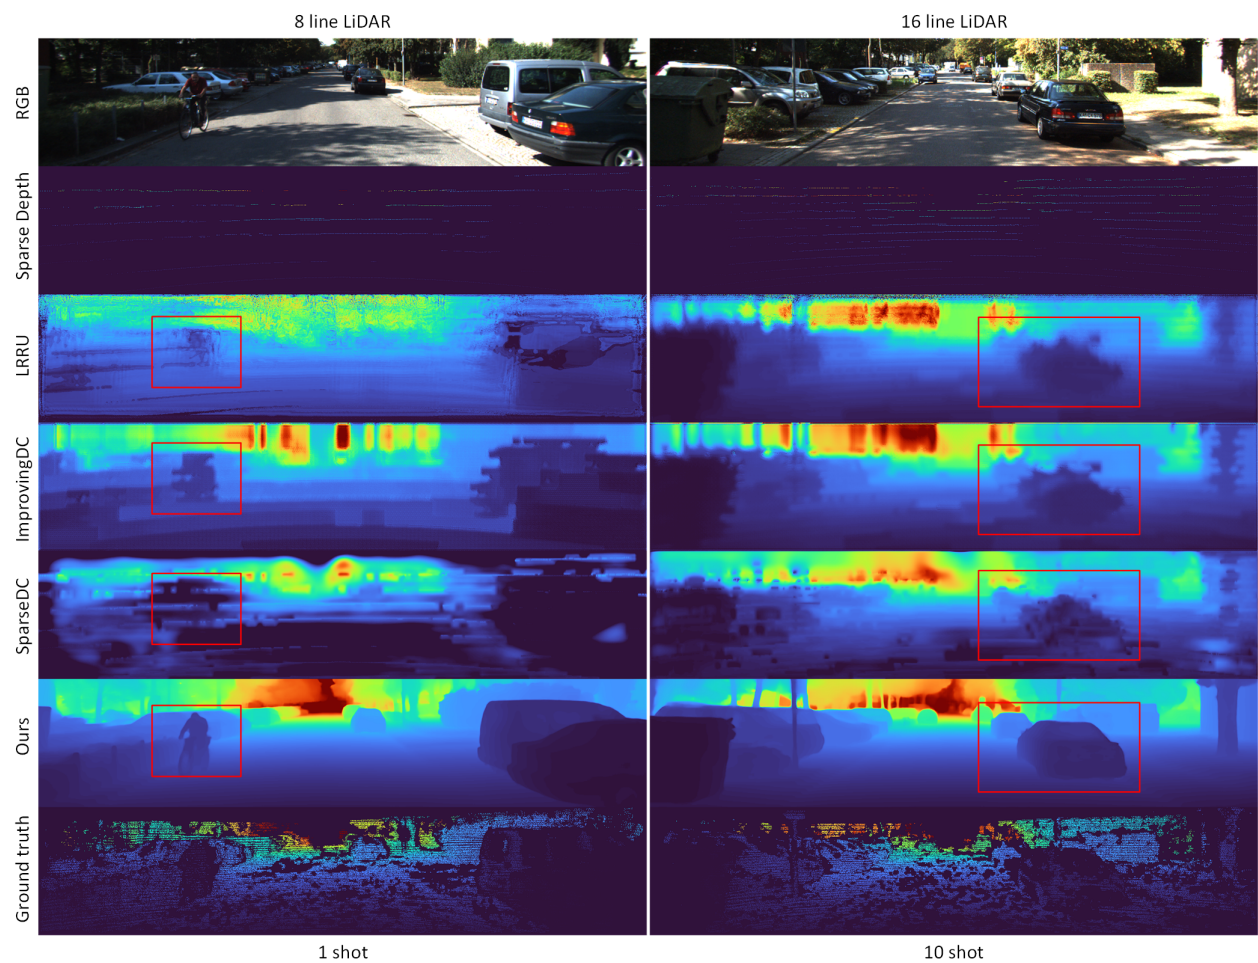

Figure 9. **Few-shot depth completion** on KITTI with 8- and 16-lines LiDAR, using models trained with 1 and 10 samples, respectively.



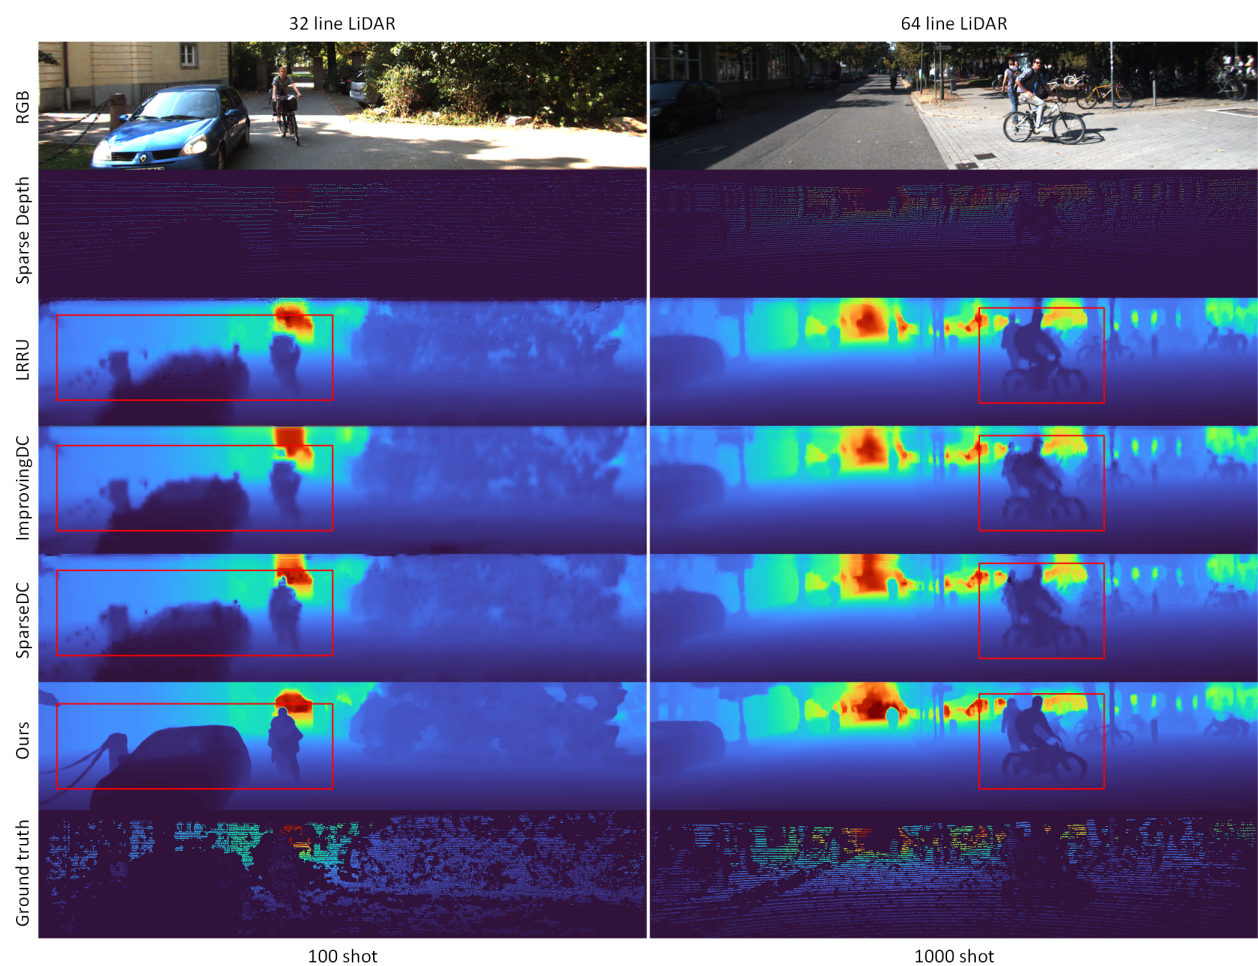

Figure 10. **Few-shot depth completion** on KITTI with 32- and 64-lines LiDAR, using models trained with 100 and 1000 samples, respectively.
